# Supplementary figures and images for: Multilayer ferromagnetic spintronic devices for neuromorphic computing applications
Source: Royal Society of Chemistry journal article supplement (doi:10.1039/d4nr01003e), 2024-01-01

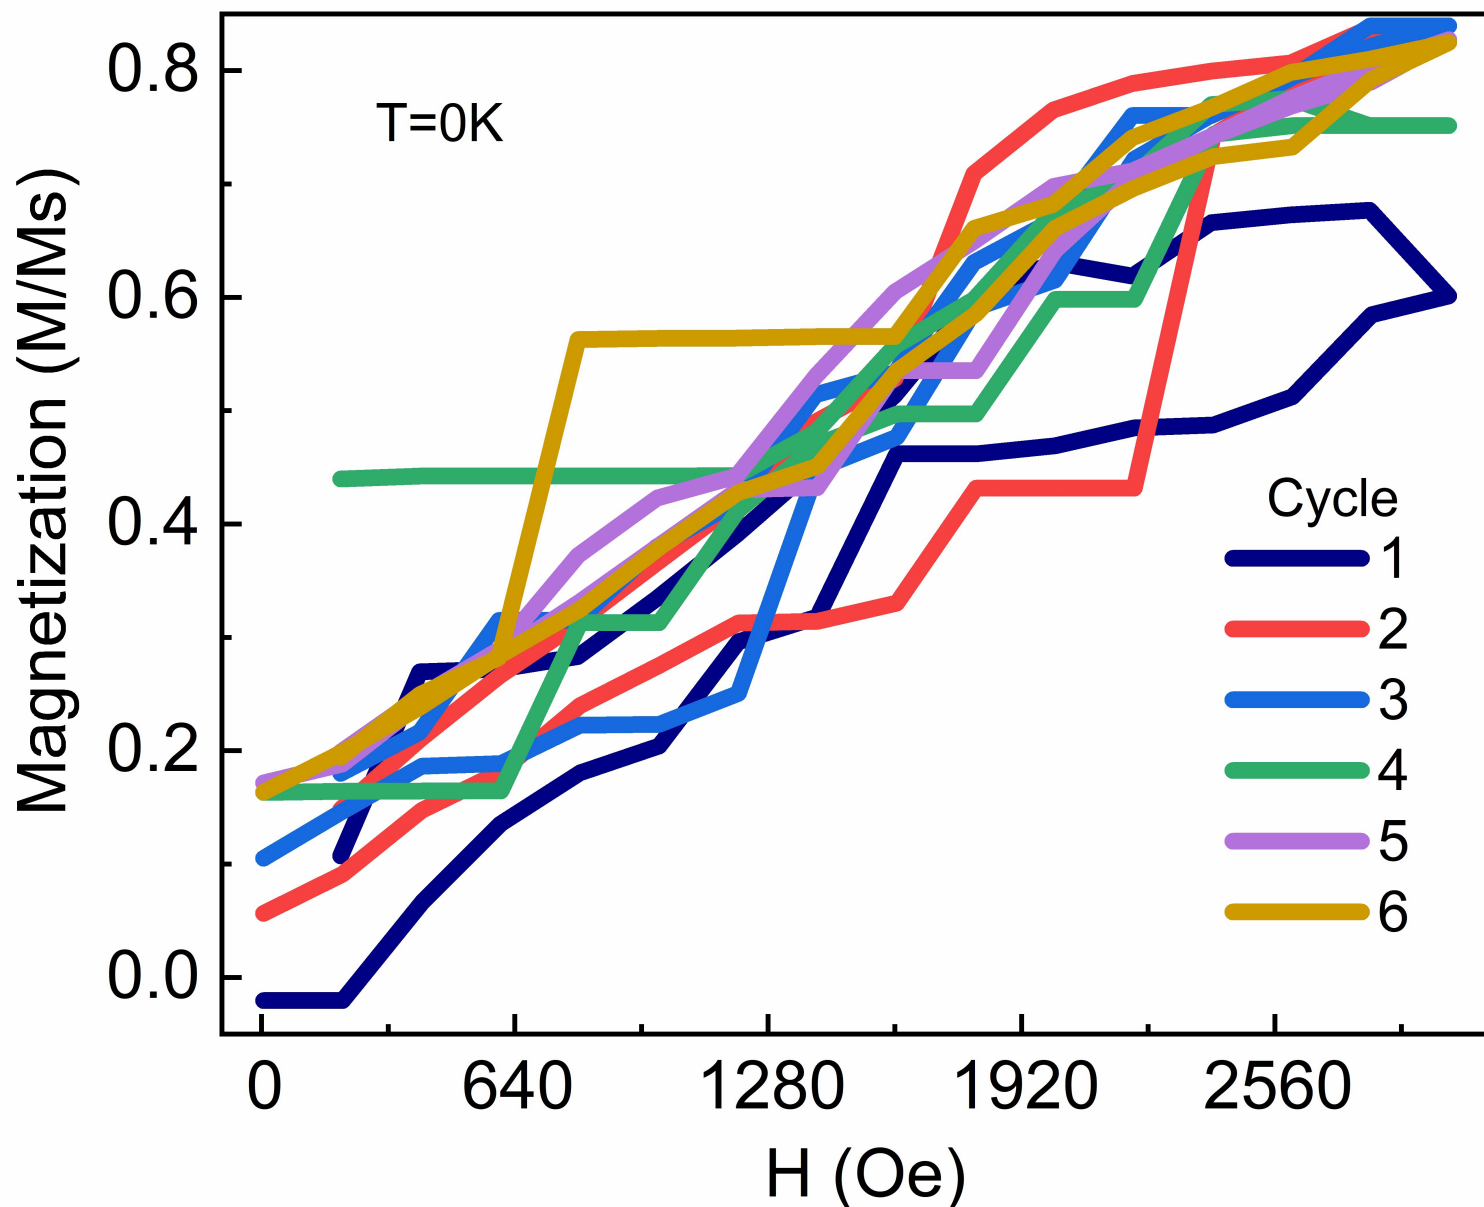

Supplement: d4nr01003e1.pdf [file d4nr01003e1.pdf]
